# Supplementary material
Source: PubMed Central journal article supplement (PMC6177226)
Supplement: NIHMS958063-supplement.pdf [file NIHMS958063-supplement.pdf]

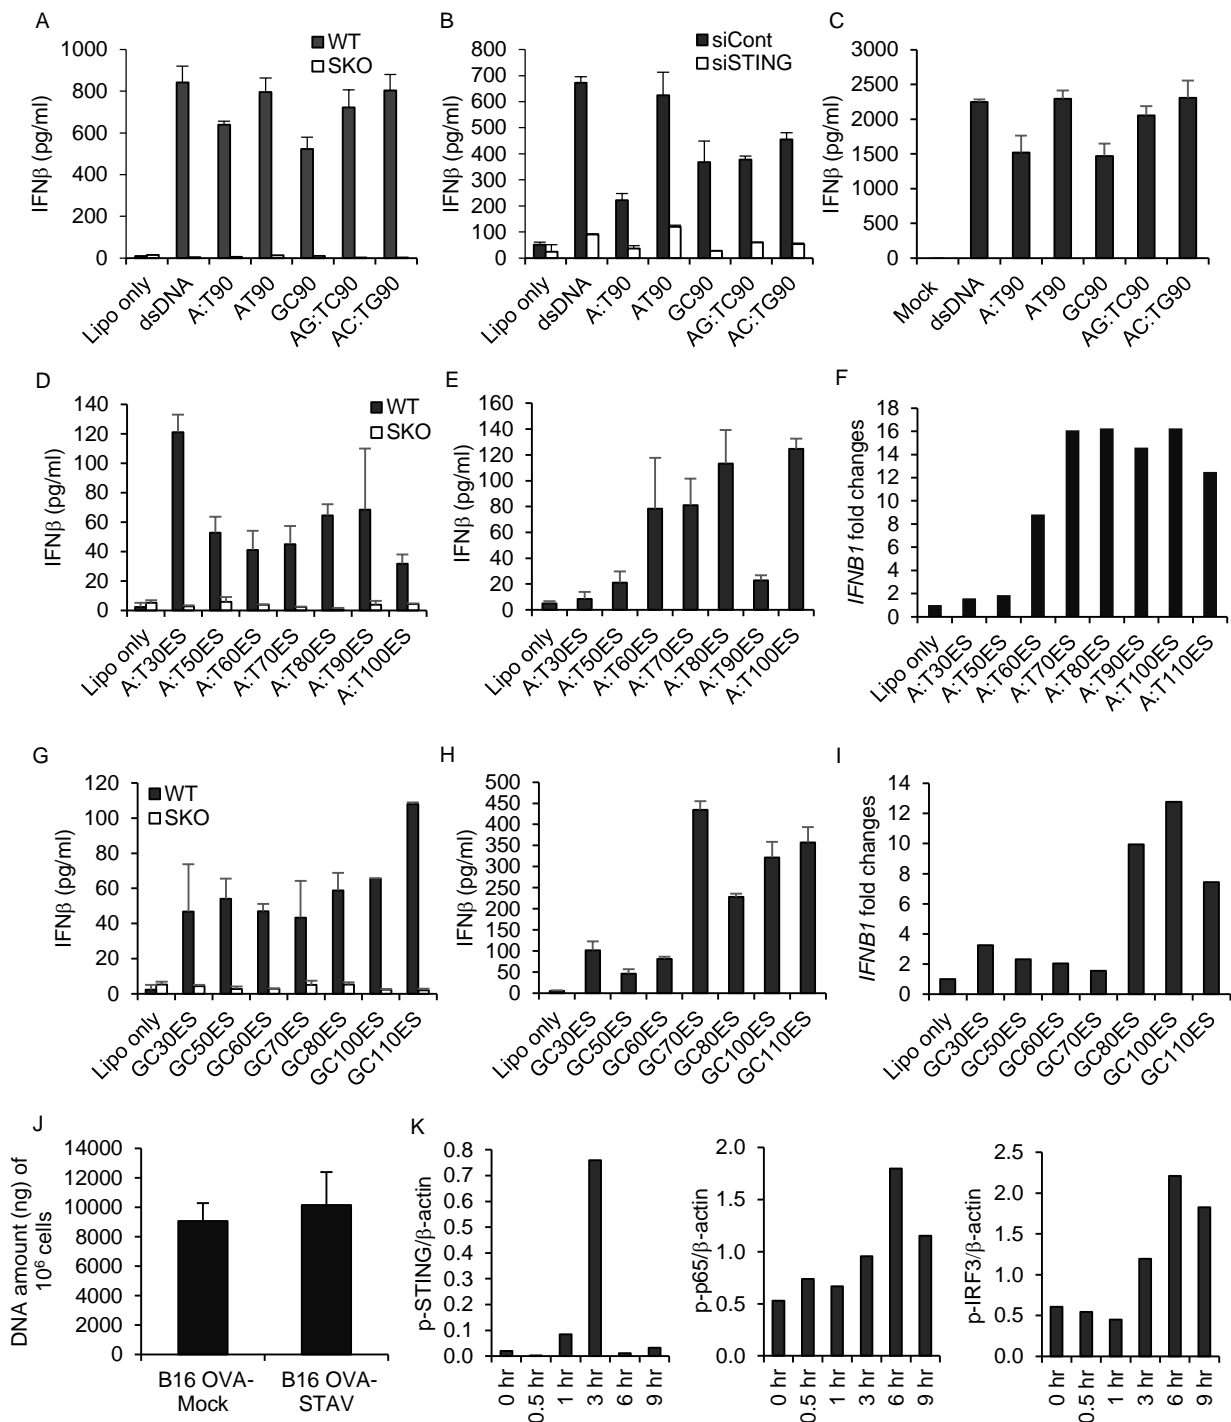

**Figure S1, related to Figure 1. Various STING ligands with different sequences and length (related to Figure 1).** (A-C) IFN $\beta$  ELISA assay in MEFs (A), hTERT (B) or human Macrophages (C) transfected with various STING ligands of different sequences. (D, E) IFN $\beta$  ELISA assay in MEFs (D), hTERT (E) transfected with different length of AT rich-STING ligands. (F) qRT-PCR analysis of *IFNB1* in human macrophages transfected with different length of AT rich-STING ligands. (G, H) IFN $\beta$  ELISA assay in MEFs (G), hTERT (H) transfected with different length of GC rich-STING ligands. (I) qRT-PCR analysis of *IFNB1* in human macrophages transfected with different length of GC rich-STING ligands. (J) Evaluation of total DNA amount in B16 OVA cells transfected with 3  $\mu$ g of STAVs. (K) Quantitative densitometry of the protein expression of Western Blot in Figure 1D. Error bars indicate mean  $\pm$  SD.

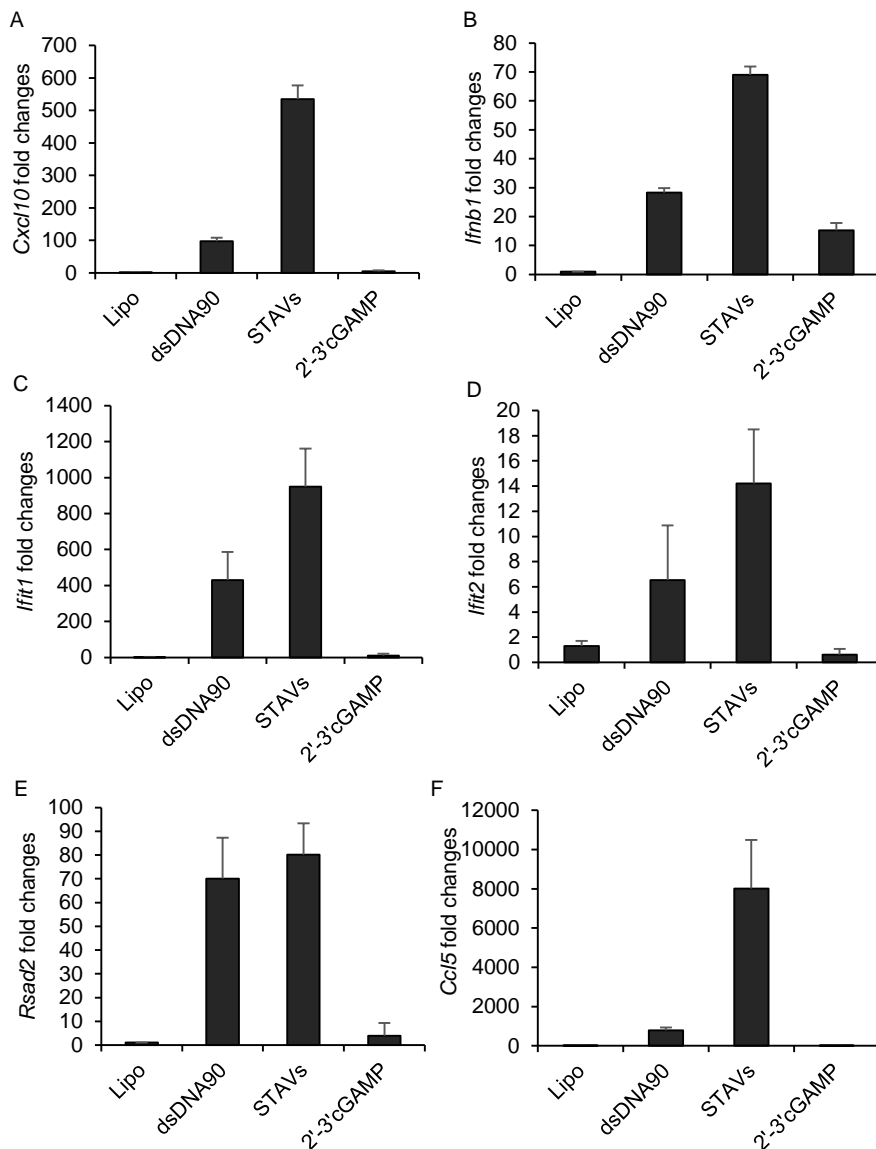

**Figure S2, related to Figure 1. qPCR analysis of gene expression in B16-OVA cells induced by various DNA stimuli.** (A-F) B16-OVA cells were transfected with 3  $\mu$ g/ml dsDNA90, STAVs or 2'-3'cGAMP for 3 hr. Total RNA was extracted and analyzed by qRT-PCR for stimulation of a panel of innate immune responsive genes. qRT-PCR of *Cxcl10* (A), *Ifnb1* (B), *Ifit1* (C), *Ifit2* (D), *Rsad2* (E), *Ccl5* (F). Error bars indicate mean  $\pm$  SD.

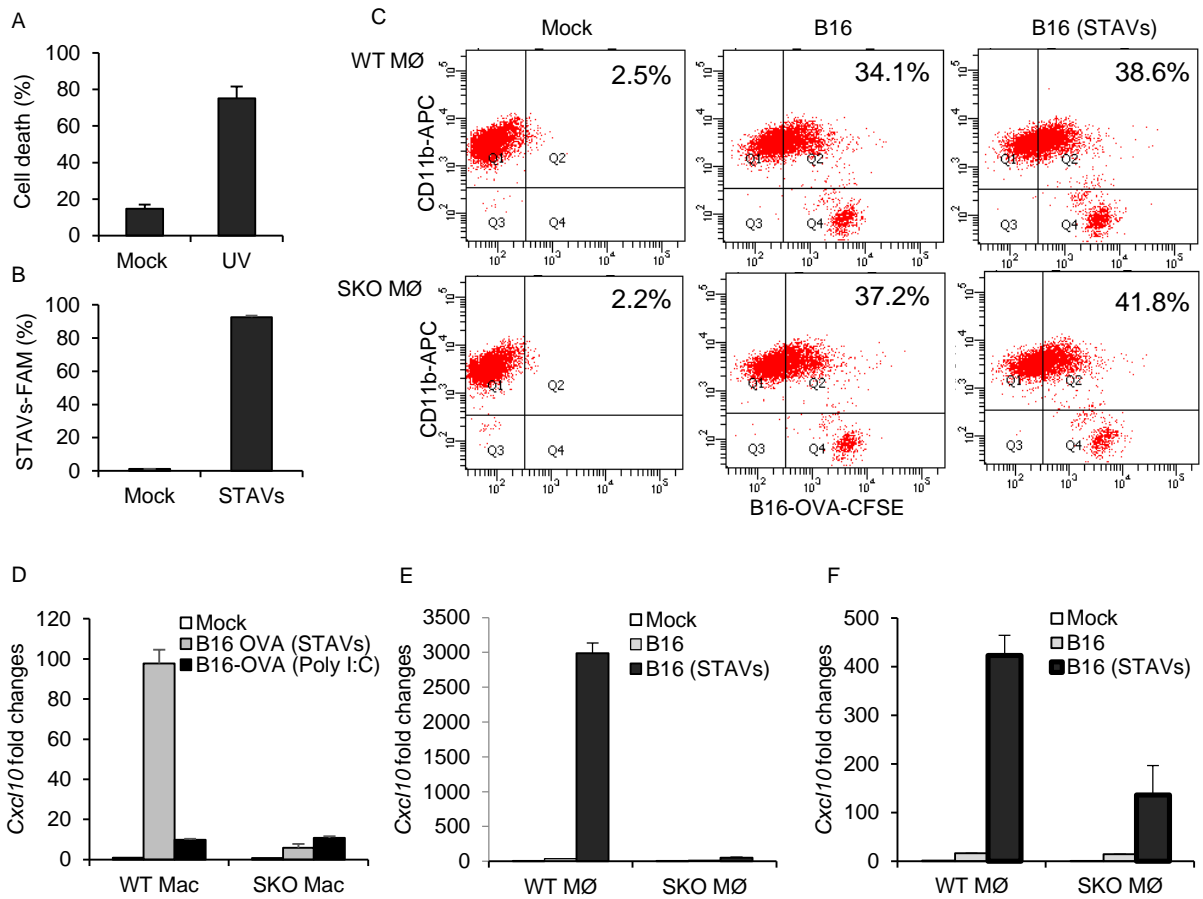

**Figure S3, related to Figure 1. Activation of macrophages and dendritic cells following phagocytosis of B16 cells.** (A) Percentage of cell death of UV treated B16 cells stained with propidium iodide and annexin V staining by flow cytometry. (B) Flow cytometry analysis for residual FITC-labelled STAVs in B16 cells at 24 hr after UV irradiation. (C) Percentage of phagocytosis by WT or SKO macrophages (CD11b-APC) following cellular engulfment of CFSE labelled B16 cells (FITC) with or without STAVs. (D) qRT-PCR analysis of *Cxcl10* in WT and SKO MØ following engulfment of UV-irradiated B16 cells containing STAVs or Poly I:C. (E, F) qRT-PCR analysis of *Cxcl10* in WT and SKO MØ following engulfment of Cisplatin (50  $\mu$ M) (E) or hydrogen peroxide ( $H_2O_2$ , 10 mM) (F) treated B16 cells containing STAVs. Error bars indicate mean  $\pm$  SD.

**Table S1, related to Figure 1. Fold changes of gene array analysis in B16 cells transfected with STAVs.**

| <b>Gene_Symbol</b>   | <b>STAVs vs Mock</b> |
|----------------------|----------------------|
| <i>Ccl5</i>          | 80.0                 |
| <i>Ifit1</i>         | 66.1                 |
| <i>Ifih1</i>         | 49.9                 |
| <i>Cxcl10</i>        | 34.5                 |
| <i>Mx2</i>           | 21.3                 |
| <i>Gbp7</i>          | 20.3                 |
| <i>Rsad2</i>         | 19.0                 |
| <i>Isg15</i>         | 17.9                 |
| <i>Gbp3</i>          | 14.1                 |
| <i>Gm20559</i>       | 13.4                 |
| <i>Parp14</i>        | 12.4                 |
| <i>Ddx58</i>         | 11.2                 |
| <i>1700007K13Rik</i> | 9.1                  |
| <i>Trp53inp1</i>     | 8.7                  |
| <i>Klhl38</i>        | 8.0                  |
| <i>Oasl1</i>         | 7.7                  |
| <i>Tmem140</i>       | 7.6                  |
| <i>Gbp2</i>          | 7.1                  |
| <i>Mx1</i>           | 6.8                  |
| <i>Usp18</i>         | 6.8                  |
| <i>Parp9</i>         | 6.3                  |
| NA                   | 6.3                  |
| <i>Oasl2</i>         | 6.1                  |
| <i>Btg2</i>          | 5.9                  |
| <i>Plk2</i>          | 5.8                  |
| <i>Apo19b</i>        | 5.7                  |
| <i>Cmpk2</i>         | 5.6                  |
| <i>Irgm1</i>         | 5.5                  |
| <i>Csf1</i>          | 5.0                  |
| <i>9230114K14Rik</i> | 4.9                  |
| <i>Ddx60</i>         | 4.7                  |
| NA                   | 4.7                  |
| <i>Tapbp</i>         | 4.6                  |
| <i>Irgm2</i>         | 4.4                  |
| <i>Samd9l</i>        | 4.4                  |
| <i>Herc6</i>         | 4.4                  |
| NA                   | 4.4                  |
| <i>Apobec1</i>       | 4.3                  |
| <i>Sesn2</i>         | 4.2                  |
| <i>Ifitm3</i>        | 4.1                  |
| <i>Tnfrsf10b</i>     | 4.1                  |
| <i>Stat2</i>         | 4.0                  |
| <i>Rhbdf2</i>        | 3.9                  |
| <i>Nfkbie</i>        | 3.9                  |
| <i>Trim21</i>        | 3.8                  |
| NA                   | 3.7                  |
| <i>Znfx1</i>         | 3.7                  |
| <i>Xaf1</i>          | 3.6                  |

Gene expression fold changes of illumina array shown in Figure 1B. Fold change analysis was performed between two groups and differentially expressed genes were selected based on threshold of Fold change  $\geq 3$  from a comparison between untransfected and STAVs transfected B16 cells.

**Table S2, related to Figure 2. Fold changes of gene array analysis in WT or SKO macrophages following phagocytosis of UV-irradiated B16 cells.**

| Gene Symbol    | WT MØ (293) | WT MØ (293-STAVs) | SKO MØ (293) | SKO MØ (293-STAVs) |
|----------------|-------------|-------------------|--------------|--------------------|
| <i>Gm14446</i> | 2.7         | 86.4              | 1.1          | 1.0                |
| <i>Cmpk2</i>   | 5.2         | 80.0              | 1.7          | 1.5                |
| <i>Cxcl10</i>  | 3.1         | 64.1              | 1.4          | 1.4                |
| NA             | 4.4         | 56.3              | 16.3         | 10.7               |
| <i>Gm4951</i>  | 3.1         | 51.8              | 1.0          | 1.1                |
| NA             | 1.1         | 51.1              | 34.6         | 32.5               |
| <i>Ccl12</i>   | 2.2         | 45.4              | 2.6          | 1.6                |
| <i>Rsad2</i>   | 4.2         | 44.8              | 1.3          | 1.2                |
| <i>Ifi205</i>  | 3.9         | 43.7              | 1.1          | 1.0                |
| <i>Cd69</i>    | 1.8         | 42.0              | 1.1          | 1.2                |
| <i>Ifit1</i>   | 3.5         | 40.2              | 1.2          | 0.9                |
| <i>Iigp1</i>   | 1.4         | 35.4              | 0.5          | 0.6                |
| <i>Igtp</i>    | 2.8         | 33.6              | 1.8          | 1.5                |
| <i>Usp18</i>   | 3.4         | 31.4              | 1.5          | 1.0                |
| <i>Pyhin1</i>  | 0.9         | 31.2              | 0.4          | 0.3                |
| <i>Mx1</i>     | 1.7         | 29.3              | 0.6          | 0.6                |
| <i>Mx2</i>     | 2.1         | 27.7              | 0.7          | 0.7                |
| <i>Gbp5</i>    | 1.3         | 27.2              | 0.9          | 0.7                |
| NA             | 1.7         | 24.6              | 1.1          | 0.9                |
| <i>Pydc3</i>   | 4.0         | 24.2              | 1.0          | 0.7                |
| <i>Oasl1</i>   | 1.9         | 24.0              | 1.2          | 1.2                |
| <i>Tnfsf10</i> | 1.5         | 23.2              | 0.9          | 0.8                |
| <i>Serpib2</i> | 23.0        | 23.2              | 19.5         | 19.0               |
| <i>Trim30c</i> | 1.1         | 20.5              | 0.9          | 0.7                |
| NA             | 3.6         | 20.1              | 2.7          | 2.4                |
| <i>Gbp3</i>    | 1.6         | 19.4              | 1.1          | 1.2                |
| NA             | 10.1        | 19.1              | 9.4          | 9.6                |
| <i>Pydc4</i>   | 0.8         | 18.9              | 0.3          | 0.3                |
| NA             | 9.5         | 18.9              | 2.7          | 6.0                |
| <i>Ifit2</i>   | 1.7         | 18.2              | 1.2          | 1.0                |
| NA             | 14.5        | 18.1              | 6.1          | 6.1                |
| NA             | 14.5        | 18.1              | 6.1          | 6.1                |
| <i>Gm12250</i> | 0.9         | 17.4              | 0.5          | 0.5                |
| <i>Irf7</i>    | 1.4         | 16.9              | 1.0          | 0.8                |
| NA             | 1.4         | 16.3              | 0.9          | 0.9                |
| NA             | 1.1         | 16.2              | 0.9          | 0.6                |
| NA             | 5.6         | 15.9              | 3.4          | 1.6                |
| <i>Isg15</i>   | 1.9         | 15.7              | 1.0          | 0.7                |
| <i>Phf11b</i>  | 1.1         | 15.7              | 0.9          | 0.9                |
| <i>Ccl2</i>    | 5.6         | 14.9              | 5.4          | 5.9                |
| NA             | 4.7         | 14.6              | 14.0         | 20.7               |
| <i>Ddx60</i>   | 0.9         | 14.5              | 1.1          | 0.9                |
| <i>Zbp1</i>    | 1.7         | 13.8              | 1.1          | 1.1                |
| NA             | 1.1         | 13.5              | 0.5          | 0.5                |
| <i>Cd274</i>   | 3.1         | 13.1              | 2.5          | 3.6                |

Gene expression fold changes of illumina array shown in Figure 2B. Fold change analysis was performed between two groups and differentially expressed genes were selected based on threshold of Fold change  $\geq 13$  from a comparison between untreated WT macrophages (MØ) and WT MØ and SKO MØ following engulfment of irradiated 293 cells with/without STAVs.

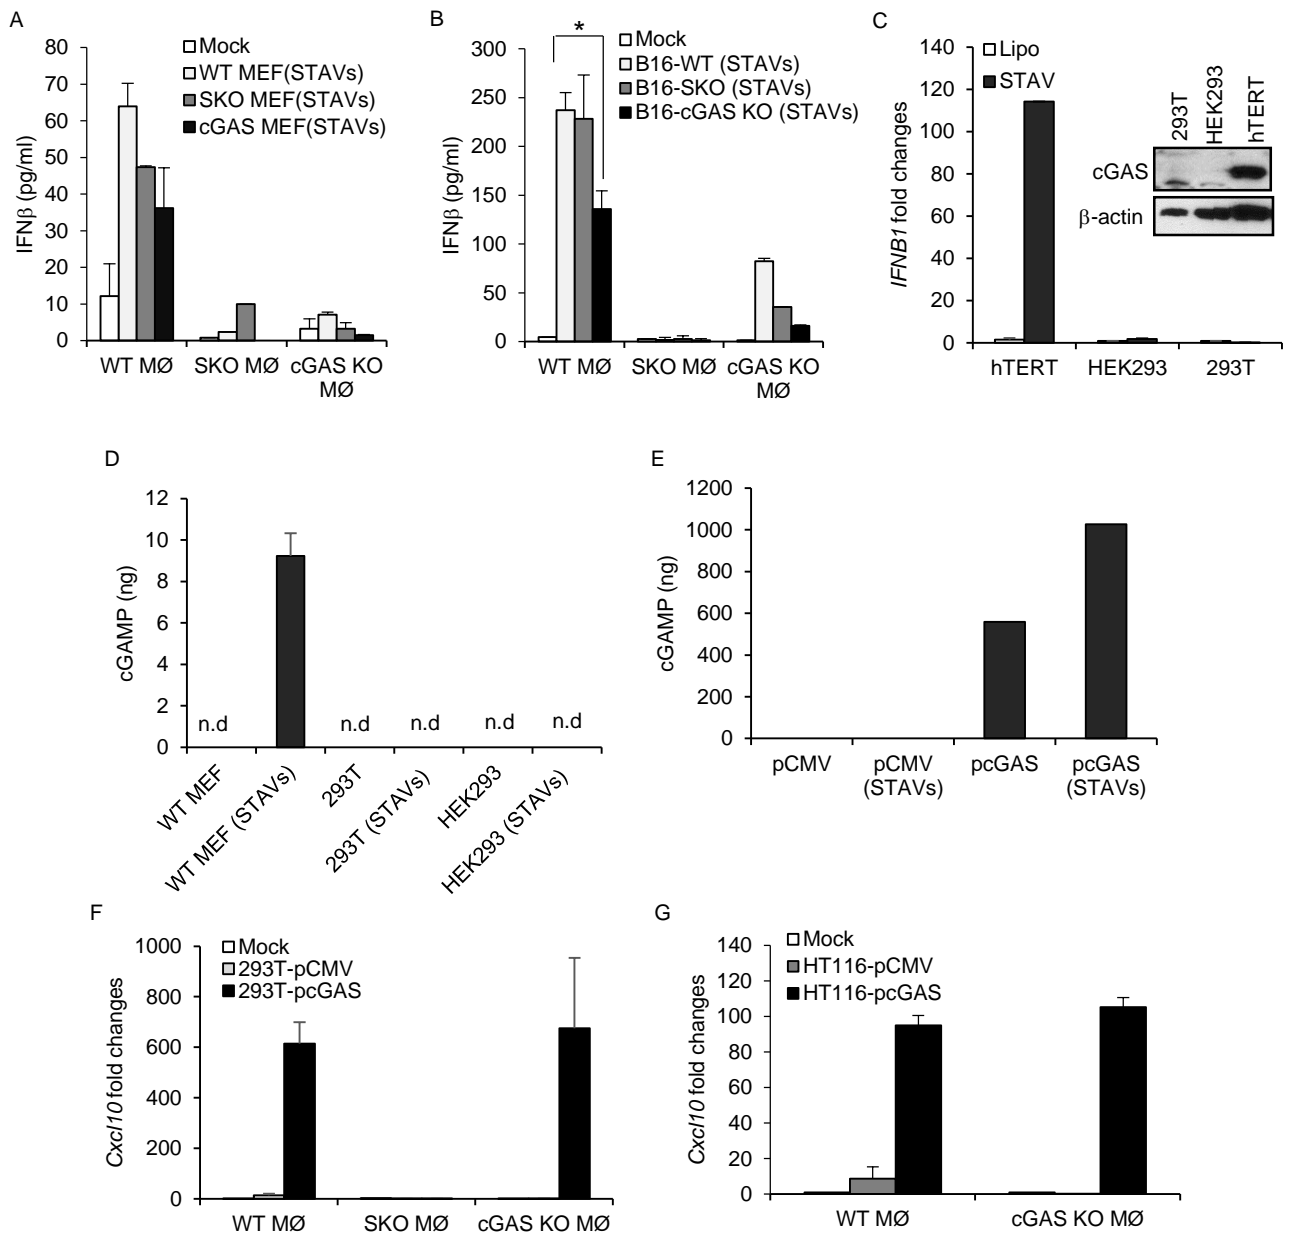

**Figure S4, related to Figure 3 and 4. Macrophage activation following phagocytosis of STING or cGAS deficient cells.** (A) ELISA analysis of IFN $\beta$  in WT, SKO and cGASKO macrophages following engulfment of UV irradiated WT, SKO and cGAS KO MEFs with STAVs. (B) ELISA analysis of IFN $\beta$  in WT, SKO and cGASKO macrophages following engulfment of UV irradiated B16 OVA (B16-WT), B16 OVA-SKO (B16-SKO) and B16 OVA-cGAS KO (B16-cGAS KO) cells with STAVs. B16 OVA-SKO and B16 OVA-cGAS KO cells were generated by CRISPR technique. (C) qRT-PCR analysis of *IFNB1* and western blot analysis of cGAS expression in human cell lines such as hTERT, HEK293, and 293T cells transfected with STAVs. Data is representative of at least three independent experiments. Error bars indicate s.d. \*;  $p < 0.05$ , Student's t-test. (D) Measurement of cGAMP levels by a hybrid mass spectrometer in 293T cells. The 293T cells were reconstituted with pcGAS or pCMV as control vector. n.d.: not detected. (E) Measurement of cGAMP levels by a hybrid mass spectrometer in 293T with/without STAVs. (F) qRT-PCR analysis of *Cxcl10* in WT, SKO, and cGAS KO macrophages following engulfment of UV-irradiated 293T cells reconstituted with/without pcGAS vector. (G) qRT-PCR analysis of *Cxcl10* in WT, SKO, and cGAS KO macrophages following engulfment of UV-irradiated HT116 cells reconstituted with/without pcGAS vector. Error bars indicate mean  $\pm$  SD.

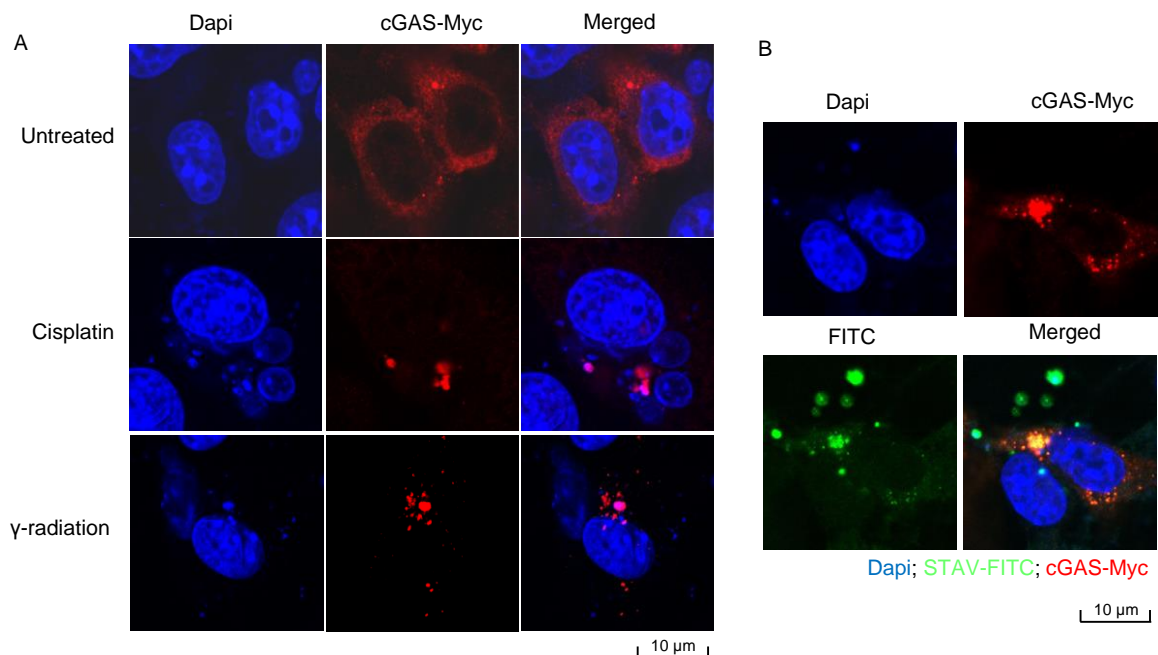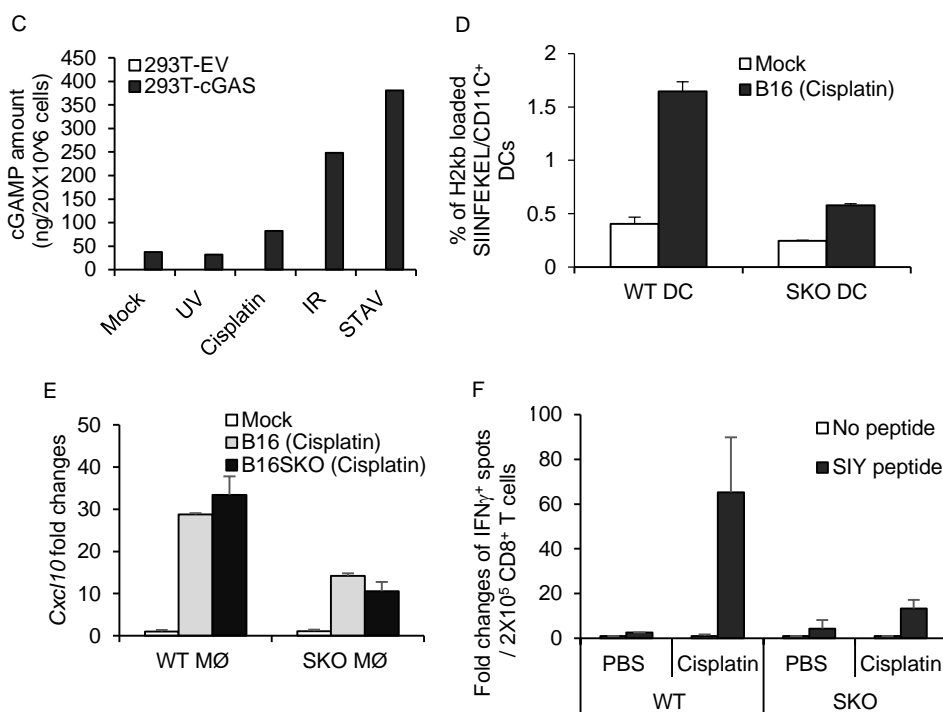

**Figure S5, related to Figure 4. cGAS activation by cytosolic DNA.** (A) Fluorescent Microscopy analysis of B16-OVA cells treated with Cisplatin (10  $\mu$ M) for 48 hr or  $\gamma$ -radiation (10 Gy) for 6 days. B16 cells were transfected with cGAS-Myc 24 hr prior to staining and stained with anti-c-Myc antibody (red) and DAPI for nuclear counter staining (blue). Merged images show colocalization of cytosolic micronuclear DNA and cGAS (purple); bar size, 10  $\mu$ m. (B) Fluorescent Microscopy analysis of B16-OVA cells co-transfected with cGAS-Myc (red) and STAV-FITC (green). DAPI is used for nuclear counter staining (blue). Merged images show colocalization of STAV DNA and cGAS (orange); bar size, 10  $\mu$ m. (C) Mass-Spectrometry analysis of cGAMP production in 293T stable cell lines expressing cGAS treated with UV (120 mJ/cm<sup>2</sup>), Cisplatin (50  $\mu$ M), IR (100 Gy), and STAVs (3  $\mu$ g/ml) for 24 hr. 293T-EV: control vector, 293T-cGAS: cGAS expressing retroviral vector. (D) H2kb loaded SIINFEKEL on CD8 $\alpha$ <sup>+</sup>CD11C<sup>+</sup> dendritic cells following phagocytosis of cisplatin-treated B16 cells. (E) qRT-PCR analysis of *Cxcl10* in WT and SKO macrophages following phagocytosis of cisplatin treated B16 cells. (F) IFN $\gamma$  ELISPOT assay in CD8<sup>+</sup> T cells from WT, SKO and cGASKO mice treated with cisplatin. The mice were subcutaneously injected with B16-SIY cells on the flank. 50  $\mu$ g of cisplatin was injected intraperitoneally once a week three times. CD8<sup>+</sup> T cell priming was evaluated by IFN $\gamma$  ELISPOT. Error bars indicate mean  $\pm$  SD.

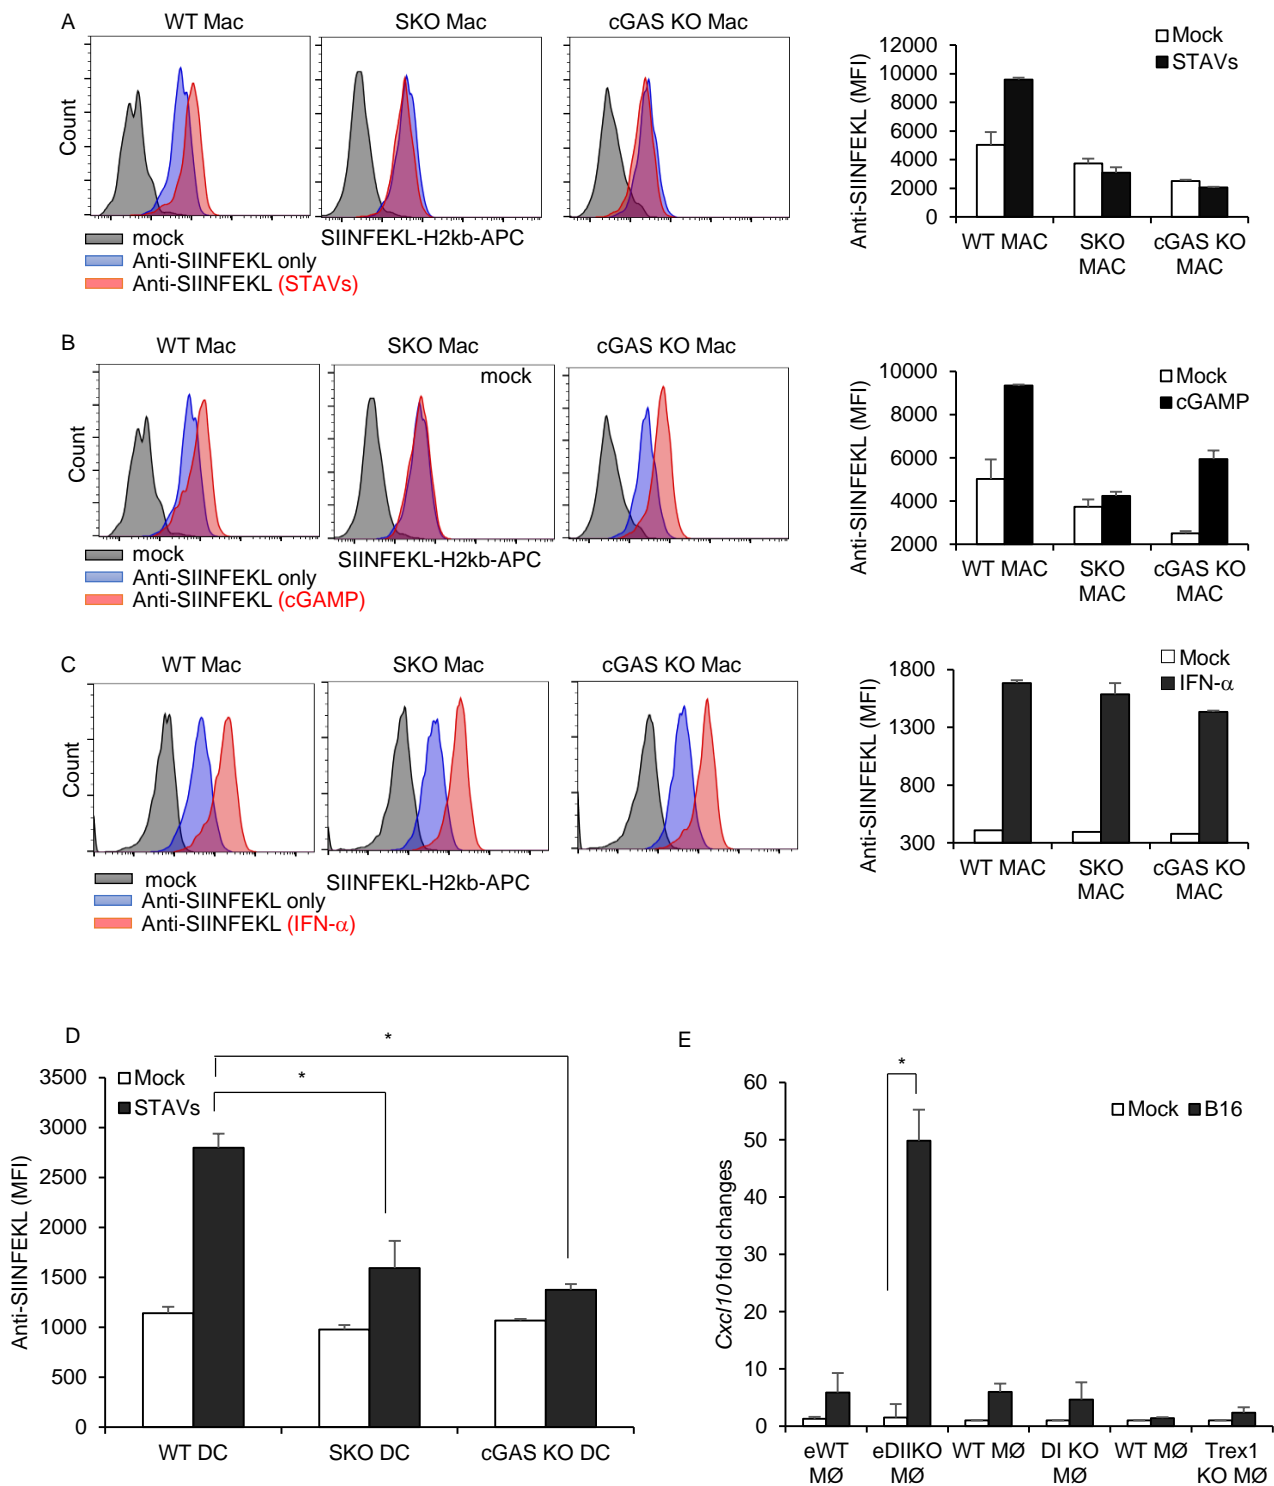

**Figure S6, related to Figure 6. Activation of antigen presenting cells by STAVs.** (A-C) WT, SKO, cGAS KO macrophages were transfected with 3  $\mu$ g/ml of STAVs (A) or cGAMP (B) and IFN- $\alpha$  (C) treatment for 24 hr followed by pulsing with or without SIINFEKL. Antigen presentation was evaluated by flow cytometry analysis using antibody reacting with OVA peptide SIINFEKL bound to H-2Kb of MHC class I. (D) H2kb loaded SIINFEKL on CD8 $\alpha$ <sup>+</sup>CD11c<sup>+</sup> dendritic cells transfected with 3  $\mu$ g/ml of STAVs for 24 hr using same antibody as (A-C). (E) qRT-PCR analysis of *Cxcl10* in WT, DNase II KO, DNase I KO, Trex1 KO macrophages following phagocytosis of irradiated B16-OVA. DI KO; DNase I KO, eWT; WT embryo, eDII KO; DNase II KO embryo. Error bars indicate mean  $\pm$  SD. \*;  $p < 0.05$ , Student's t-test.



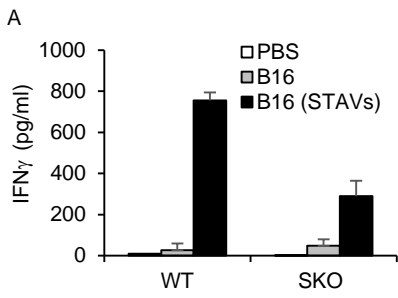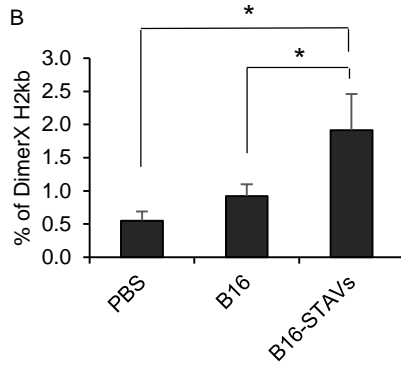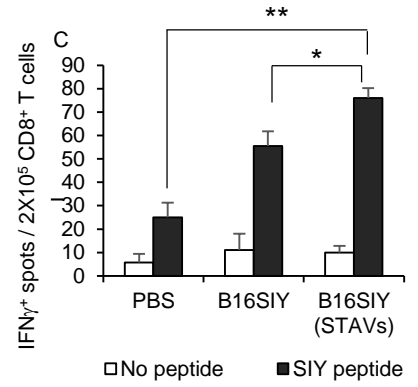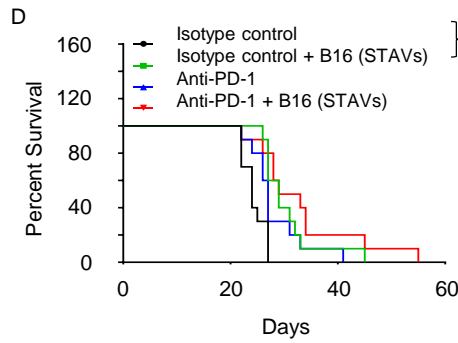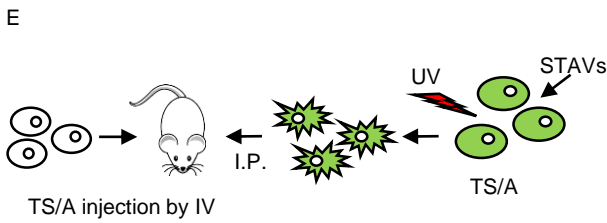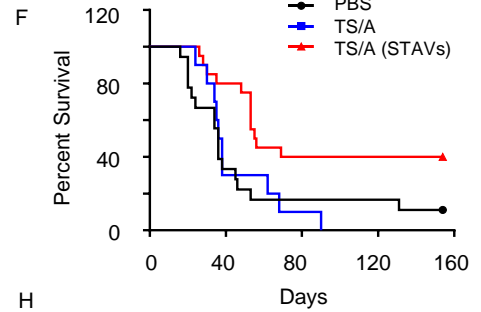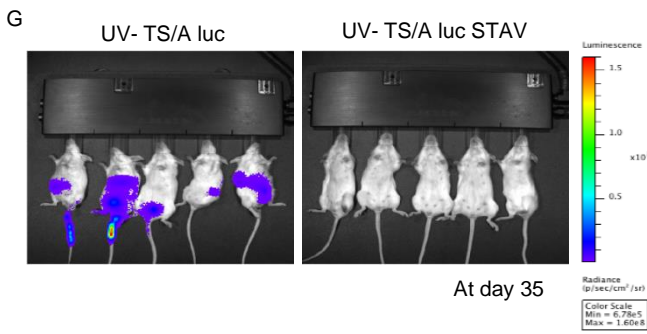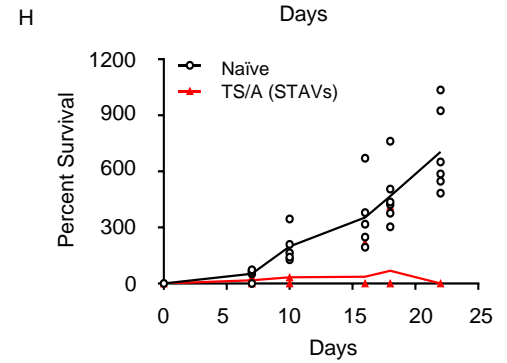

**Figure S7, related to Figure 7. Protection of tumor metastasis by dead cell immunization and checkpoint inhibitor and CD8<sup>+</sup> T cell priming.** (A) IFN $\gamma$  measurement in splenocytes from WT and SKO at 7 days after the second immunization. B16 OVA cells were transfected by STAVs for 3 hr and irradiated by UV (120 mJ/cm). After 24 hr, WT and SKO were i.p. injected with the irradiated B16 cells with/without STAV, twice every week. (B) Frequency of SIY specific CD8<sup>+</sup> T cells in the splenocytes isolated from WT mice immunized with UV irradiated-B16 SIY cells containing STAVs. (C) IFN $\gamma$  ELISPOT analysis in CD8<sup>+</sup> T cells isolated from same mice as (B). (D) C57/BL6 WT mice were I.V. injected with B16 OVA cells (5X10<sup>6</sup> cells/mouse). On day 1, 3, 7, and 14, the mice were I.P injected by UV irradiated B16 OVA cells (1X10<sup>6</sup> cells/mouse) with STAVs. On same days, mice were injected with 100  $\mu$ g either Isotype control or anti-PD-1. Survival rates control (n=10), B16 (STAVs) (n=10), anti-PD-1 (n=10), and combination with anti-PD-1 and B16 (STAVs) (n=10). Armenian Hamster IgG was used as control. p=0.0002. p values are based on Logrank test, with p<0.05 considered statistically significant. \*: p<0.05, \*\*: p<0.005, \*\*\*: p<0.0005. (E) Schematic representation of post-vaccination for TS/A-luc cells mediated lung metastasis. Balb/C mice were I.V. injected with TS/A-luc cells (1X10<sup>5</sup> cells/mouse). On day 1, 3, and 14, the mice were I.P injected by UV irradiated TS/A-luc cells (4X10<sup>6</sup> cells/mouse) with or without STAVs. (F) Survival rates of PBS, TS/A-luc, and TS/A-luc (STAVs). TS/A-luc: post-vaccinated group with UV irradiated TS/A-luc cells, TS/A-luc (STAVs): UV irradiated TS/A-luc cells with STAVs (TS/A vs TS/A (STAVs): p=0.008, n=20/group). p values are based on Logrank test, with p<0.05 considered statistically significant. (G) TS/A-luc or TS/A-luc (STAVs) mice were anesthetized and injected with a luciferin substrate i.p., and the luciferase activity was detected on day 35 using IVIS. (H) The immunized mice with TS/A-luc (STAVs) were re-challenged with TS/A-luc cells 1X10<sup>5</sup> cells/mouse) on the flank (n=6). Naïve mice were used as controls (n=6). Tumor size was measured at the indicated time points. (Naïve mice vs TS/A (STAVs): p=0.03, Student's t-test). Error bars indicate mean  $\pm$  SD.
